# Supplementary material for: Climate change risks on key open marine and coastal mediterranean ecosystems
Source: Sci Rep. 2025 Jul 10;15:24907. doi: 10.1038/s41598-025-07858-x (PMC12246105; doi:10.1038/s41598-025-07858-x)
Supplement: Supplementary file 1 — Supplementary Material 1 [file 41598_2025_7858_MOESM1_ESM.xlsx]

## Sheet: Open marine ecosystems
Ecosystems	Publications	Main drivers	Risk	Confidence level	ΔSST (°C)	Climate Scenarios /Method for conversion to ΔSST	General study area	Specific Sites	Type of study	Country of the first author	DOI
EPIPELAGIC	Gazeau et al. (2017)	Ocean Acidification	Undetectable	High	+2.2 to +4.3	cf. mat. and met. for conversion pH vs SST	West Mediterranean	Bay of Villefranche and Bay of Calvi	Mesocosm Experiment	France	https://doi.org/10.1016/j.ecss.2016.11.016
	Maugendre et al. (2015)	Ocean Warming	Undetectable	High	+3		North-West Mediterranean		Lab. Experiment	France	doi:10.1093/icesjms/fsu161
	Maugendre et al. (2017)	Ocean Acidification	Undetectable	High	+2 to +4.3	cf. mat. and met. for conversion pH vs SST	West Mediterranean	Bay of Villefranche and Bay of Calvi	Mesocosm Experiment	France	https://doi.org/10.1016/j.ecss.2015.03.009
	Benedetti et al. (2018)	Ocean Warming, Salinity Changes	Undetectable to Moderate	Low	+0.8 to +3.1	SRES A2, A1B and B1 (mid- and late century)	Mediterranean Sea		Modeling	France	https://doi.org/10.1111/ecog.02434
	Herrmann et al. (2014)	Ocean Stratification/Circulation	Undetectable to Moderate	High	+1 to +3.1	SRES A2 (mid- and late century)	North-West Mediterranean		Modeling	France	https://doi.org/10.1002/2014JC010016
	Lazzari et al. (2014)	Ocean Warming	Undetectable to Moderate	High	~+1 to +2	SRES A1B (end of the century)	Mediterranean Sea		Modeling	Italy	https://doi.org/10.1016/j.jmarsys.2013.06.005
	Macías et al. (2015)	Ocean Stratification/Circulation	Undetectable to Moderate	High	+0.8 to +3.1	RCP4.5 and 8.5 (mid- to end of the century)	Mediterranean Sea		Modeling	Italy	https://doi.org/10.3389/fmars.2015.00079
	Moltó et al. (2021)	Ocean Warming , Solar Radiation	Undetectable to Moderate	High	+1.6 to +3.1	RCP4.5 and 8.5 (late century)	West Mediterranean	Balearic islands, Tunisia, Malta, Sicily	Modeling	Spain	https://doi.org/10.1038/s41598-021-88171-1
	Reale et al. (2022)	Ocean Acidification, Deoxygenation, Nutrients Enrichment, Ocean Warming	Undetectable to Moderate	Low	+0.8 to +3.1	RCP4.5 and 8.5 (mid- and late century)	Mediterranean Sea		Modeling	Italy	https://doi.org/10.5194/bg-19-4035-2022
	Solidoro et al. (2022)	Atmospheric CO2, Ocean Warming	Undetectable to Moderate	Low	+3.1	SRES A2 (end of century)	Mediterranean Sea		Modeling	Italy	https://doi.org/10.3389/fmars.2021.781522
	Stefanidou et al. (2018)	Ocean Warming, Salinity Changes	Undetectable to Moderate	High	+6		East Mediterranean	Thessaloniki Bay	Mesocosm Experiment	Greece	https://doi.org/10.1007/s00227-018-3415-y
	Pulina et al. (2016)	Ocean Warming	Moderate	Low	+3 to +6	SRES A1B (end of century to end of two centuries)	West Mediterranean		Lab. Experiment	Italy	https://doi.org/10.5194/we-16-89-2016
	Macias et al. (2018)	Ocean Stratification/Circulation	Moderate to High	High	+0.8 to +1	RCP4.5 and 8.5 (2027–2031)	North-West Mediterranean		Remote Sensing	Italy	https://doi.org/10.1038/s41598-018-24965-0
	Richon et al. (2019)	Ocean Stratification/Circulation, Nutrients Enrichment	Moderate to High	Very High	+1 to +3.1	SRES A2 (mid- to end of century)	Mediterranean Sea		Modeling	France	https://doi.org/10.5194/bg-16-135-2019
	Schickele et al. (2021)	Ocean Stratification/Circulation, Ocean Warming	Moderate to High	High	+0.8 to +3.1	RCP2.6, 4.5 and 8.5 (mid- and end of century)	Mediterranean Sea		Modeling	France	https://doi.org/10.1038/s41598-021-83457-w
	van Leeuwen et al. (2022)	Ocean Warming	Moderate to High	High	+0.8 to +3.1	RCP4.5 and 8.5 (mid- and end century)	East Mediterranean	The Rhodes Gyre	Modeling	The Netherlands	https://doi.org/10.3354/meps14016
	Corrales et al. (2018)	Ocean Warming, Invasive Species	High	Medium to High	+0.8 to +1	RCP 2.6, RCP 4.5 and 8.5 (mid- century)	South-East Mediterranean		Modeling	Israel + Spain	https://doi.org/10.1038/s41598-018-32666-x
	Moullec et al. (2019)	Ocean Warming	High	High	+1 to +3.1	RCP8.5 (mid- and late century)	Mediterranean Sea		Modeling	France	https://doi.org/10.3389/fmars.2019.00345
	Pagès et al. (2020)	Ocean Warming, Salinity Changes, Ocean Stratification/Circulation	High	High	+1 to +3.1	RCP8.5 (mid- and late century)	Mediterranean Sea		Modeling	France	https://doi.org/10.3389/fmars.2020.563615
	Schickele et al. (2020)	Ocean Warming	High to Very High	High	+1 to +3.1	RCP2.6, 4.5 and 8.5 (end of century)	Mediterranean Sea		Modeling	France	https://doi.org/10.1111/faf.12515
	Soulié et al. (2023)	Marine Heat Waves	High to Very High	High	+5		North-West Mediterranean	Thau lagoon, a Mediterranean coastal lagoon	Mesocosm Experiment	France	https://doi.org/10.1038/s41598-023-35311-4
	D’Amario et al. (2020)	Ocean Acidification, Ocean Warming	Very High	High	+3.81 to +4.16	cf. mat. and met. for conversion pH vs SST	East Mediterranean	Crete	Mesocosm Experiment	Spain	https://doi.org/10.1038/s41598-020-69519-5
	Howes et al. (2015)	Ocean Stratification/Circulation	Very High	Medium to High	+0.8 to +3.1	RCP4.5 and 8.5 (mid- and late century)	Mediterranean Sea		Review	Germany	https://doi.org/10.3389/fmars.2015.00036
CORALLIGENOUS	Nannini et al. (2015)	Ocean Warming	Undetectable	Very high	+3		North-West Mediterranean	Gulf of La Spezia, Ligurian Sea	Lab. Experiment	Italy	https://doi.org/10.1016/j.marenvres.2015.05.005
	Nash et al. (2016)	Ocean Acidification, Ocean Warming	Undetectable	High	+3.1		North-West Mediterranean	Bay of Villefranche	Lab. Experiment	France	https://doi.org/10.5194/bg-13-5937-2016
	Cox et al. (2017)	Ocean Acidification	Undetectable to Moderate	Very High	+1.8 to +4.5	cf. mat. and met. for conversion pH vs SST	North-West Mediterranean	Villefranche Sur Mer	Mesocosm Experiment	USA + France	https://doi.org/10.1007/s00227-017-3136-7
	Gamliel et al. (2020)	Ocean Warming	Undetectable to Moderate	Low	+1.6 to +3.1	RCP4.5 and 8.5 (end of century)	Mediterranean Sea		Modeling	Israel	https://doi.org/10.1111/ecog.04423
	Kamenos et al. (2016)	Ocean Acidification	Undetectable to Moderate	High	+4		North-West Mediterranean	Ischia	CO2 vents	UK	https://doi.org/10.1098/rspb.2016.1159
	Martin et al. (2013)	Ocean Acidification, Ocean Warming	Undetectable to Moderate	High	+3.1		North-West Mediterranean	Bay of Villefranche	Lab. Experiment	France	https://doi.org/10.1002/ece3.475
	Movilla et al. (2012)	Ocean Acidification	Moderate	High	+3.81	cf. mat. and met. for conversion pH vs SST	North-West Mediterranean		Lab. Experiment	Spain	https://doi.org/10.1016/j.jembe.2012.09.014
	Gómez‐Gras et al. (2020)	Marine Heat Waves	Moderate	High	+3.1		North-West Mediterranean	Medes Islands MPA	Lab. Experiment	Spain	https://doi.org/10.1002/ece3.5045
	Hall Spencer et al. (2008)	Ocean Acidification	Moderate to High	Low	> +4.5	cf. mat. and met. for conversion pH vs SST	North-West Mediterranean	Ischia, Tyrrhenian Sub-basin	CO2 vents	UK	https://doi.org/10.1038/nature07051
	Marchini et al. (2019)	Ocean Acidification, Ocean Warming	Moderate to High	High	+3.1	RCP8.5 (end of century)	West Mediterranean	Tyrrhenian Sub-basin	In Situ	Italy	https://doi.org/10.3389/fmars.2019.00785
	Movilla et al. (2014)	Ocean Acidification	Moderate to High	Medium	+3.1	SRES A2 (end of century)	West Mediterranean		Lab. Experiment	Spain	https://doi.org/10.1007/s00338-014-1159-9
	Prada et al. (2017)	Ocean Acidification, Ocean Warming	Moderate to High	High	+4		North-West Mediterranean	Island of Panarea (Aeolian Islands, southern Italy)	CO2 vents	Italy	https://doi.org/10.1038/srep40842
	Vitelletti et al. (2023)	Salinity Changes, Ocean Warming, Nutrients Enrichment	Moderate to High	Medium	+3.1	RCP8.5 (end of century)	North-East Mediterranean	The Northern Adriatic	Modeling	Italy	https://doi.org/10.3389/fmars.2023.1050293
	Bramanti et al. (2013)	Ocean Acidification	High	High	+3.1	SRES A2 (end of century)	North-West Mediterranean		Lab. Experiment	USA + Spain	https://doi.org/10.1111/gcb.12171
	Fine et al. (2017)	Ocean Acidification, Ocean Warming	High	High	+4		South-East Mediterranean, West Mediterranean	Levantine Sub-basin and Sicily	In situ, CO2 vents	Israel	https://doi.org/10.1093/icesjms/fsw167
	Martin and Gattuso (2009)	Ocean Acidification, Ocean Warming	High	High	+3.1		North-West Mediterranean	Bay of Villefranche	Lab. Experiment	France	https://doi.org/10.1111/j.1365-2486.2009.01874.x
	Carbonne et al. (2022)	Ocean Acidification, Ocean Warming	High to Very High	High	+3.1	RCP8.5 (end of century)	West Mediterranean	Ischia Island	Lab. Experiment	France	https://doi.org/10.5194/bg-19-4767-2022
SEAGRASS MEADOWS	Beca-Carretero et al. (2020)	Invasive Species	Undetectable to Moderate	Low	+0.8 to +3.1	RCP2.6 and 8.5 (mid and end century)	Mediterranean Sea		Modeling	Germany	https://doi.org/10.3389/fpls.2020.555376
	Cox et al. (2017)	Ocean Acidification	Undetectable to Moderate	High	+1.8 to +4.5	cf. mat. and met. for conversion pH vs SST	North-West Mediterranean	Bay of Villefranche	Mesocosm Experiment	USA + France	DOI 10.1007/s00227-017-3136-7
	Hall Spencer et al. (2008)	Ocean Acidification	Undetectable to Moderate	Low	> +4.5		West Mediterranean	Ischia Island	CO2 vents	UK	https://doi.org/10.1038/nature07051
	Porzio et al. (2011)	Ocean Acidification	Undetectable to Moderate	Very High	+1 to >+4		West Mediterranean	Castello Aragonese, Ischia Island	CO2 vents	Italy	https://doi.org/10.1016/j.jembe.2011.02.011
	Porzio et al. (2013)	Ocean Acidification	Undetectable to Moderate	High	+2.5 to >+4.5		West Mediterranean	Castello Aragonese, Ischia Island	CO2 vents	Italy	https://doi.org/10.1007/s00227-013-2251-3
	Gamliel et al. (2020)	Ocean Warming	Moderate to High	Low	+1.6 to +3.1	RCP4.5 and 8.5 (end of century)	Mediterranean Sea		Modeling	Israel	https://doi.org/10.1111/ecog.04423
	Hendriks et al. (2017)	Ocean Acidification	High	High	+4 to +6		West Mediterranean	Bay of Palma	Lab. Experiment	Spain	https://doi.org/10.1016/j.aquabot.2017.02.004
	Ontoria et al. (2019)	Ocean Warming	High	High	+3.1		North-West Mediterranean	Cala Montgó	Lab. Experiment	Spain	https://doi.org/10.1371/journal.pone.0222798
	Chefaoui et al. (2018)	Ocean Warming	High to Very High	Very High	+0.8 to +3.1	RCP 2.6 and 8.5 (mid- and end of century)	Mediterranean Sea		Modeling	Portugal	https://doi.org/10.1111/gcb.14401
	Llabrés et al. (2023)	Ocean Warming	High to Very High	Medium	+0.8 to +3.1	RCP2.6, 4.5 and 8.5 (mid- and end of century)	West Mediterranean	Balearic Islands	Modeling	Spain	https://doi.org/10.3354/meps14298
	Jordà et al. (2012)	Ocean Warming	Very High	Very high	+0.9 to +2.35	SRES A1B (mid- and end of century)	West Mediterranean	Balearic Islands	Modeling	Spain	https://doi.org/10.1038/nclimate1533
	Lima et al. (2022)	Ocean Warming	Undetectable	Medium	+0.8 to +3.1	RCP 2.6, 4.5 and 8.5 (mid- and end of century)	Mediterranean Sea		Modeling	Portugal	https://doi.org/10.1016/j.scitotenv.2021.150167
FISH	Maynou et al. (2020)	Ocean Warming, Salinity Changes	Undetectable to Moderate	High	+0.8 to +3.1	RCP4.5 and 8.5 (mid- and end of century)	North-West Mediterranean	Catalan Sea continental shelf	Modeling	Spain	https://doi.org/10.1007/s10584-020-02723-4
	Moltó et al. (2021)	Ocean Warming	Undetectable to Moderate	High	+1.6 to +3.1	RCP4.5 and 8.5 (end of century)	West Mediterranean	Balearic Islands, Malta, Sicily and Tunisia	Modeling	Spain	https://doi.org/10.1038/s41598-021-88171-1
	Moullec et al. (2023)	Ocean Warming	Undetectable to Moderate	Low	+3.1	RCP8.5 (end of the century)	Mediterranean Sea		Modeling	France	https://doi.org/10.3354/meps14269
	Lima et al. (2022)	Ocean Warming	Moderate	Medium	+3.1	RCP 8.5 (end of century)	Mediterranean Sea		Modeling	Portugal	https://doi.org/10.3389/fmars.2022.956654
	Moullec et al. (2019)	Ocean Warming	Moderate	High	+1 to +3.1	RCP8.5 (mid- and end of century)	Mediterranean Sea		Modeling	France	https://doi.org/10.3389/fmars.2019.00345
	Tsagarakis et al. (2022)	Ocean Warming	Moderate	Medium	+0.8 to +1	RCP4.5 and 8.5 (mid- century)	North-East Mediterranean	Aegean Sea	Modeling	Greece	https://doi.org/10.3389/fmars.2022.919793
	D’Amen and Azzurro (2020)	Ocean Warming , Invasive Species	Moderate to High	High	+0.8 to +1	RCP2.6, 4.5, 6.0, 8.5 (mid-century)	Mediterranean Sea		Modeling	Italy	https://doi.org/10.1093/icesjms/fsz207
	Ben Lamine et al. (2022)	Ocean Warming	Moderate to High	Medium	+0.8 to +3.1	RCP2.6, 4.5 and 8.5 (mid- and end of century)	Mediterranean Sea		Modeling	France, Monaco	https://doi.org/10.1038/s41598-022-14151-8
	van Leeuwen et al. (2022)	Ocean Warming	Moderate to High	High	+0.8 to +3.1	RCP4.5 and 8.5 (mid- and end of century)	East Mediterranean	The Rhodes Gyre	Modeling	The Netherlands	https://doi.org/10.3354/meps14016
	Fernanda Loya-Cancino (2023)	Ocean Warming, Invasive Species	High	High	+0.8 to +3.1	RCP4.5 and 8.5 (mid- and end of century)	Mediterranean Sea		Modeling	Mexico	https://doi.org/10.1007/s00227-023-04174-8
	Stavrakidis-Zachou et al. (2021)	Ocean Warming	High	Medium to High	+1	RCP8.5 (mid-century)	East Mediterranean	Greece	Modeling	Greece	https://doi.org/10.1007/s10584-021-03096-y
	Albouy et al. (2013)	Ocean Warming	High to Very High	Low to medium	+1 to +3.1	SRES A2 (mid- and end of century)	Mediterranean Sea		Modeling	France	https://doi.org/10.1111/jbi.12013
	Dimitriadis et al. (2020)	Ocean Warming, Invasive Species	High to Very High	High	+0.8 to +3.1	RCP4.5 and 8.5 (mid- and end of century)	East Mediterranean		Modeling	Greece	https://doi.org/10.12681/mms.21845
	Schickele et al. (2020)	Ocean Warming	High to Very High	High	+1 to +3.1	RCP2.6, 4.5, and 8.5 (end of century)	Mediterranean Sea		Modeling	France	https://doi.org/10.1111/faf.12515
SEAWEEDS	Gamliel et al. (2020)	Ocean Warming	Moderate	Low	+1.6 to +3.1	RCP4.5 and 8.5 (end of century)	Mediterranean Sea		Modeling	Israel	https://doi.org/10.1111/ecog.04423
	Samperio-Ramos et al. (2015)	Ocean Warming, Invasive Species	High	High	+3.1	RCP8.5 (end of century)	West Mediterranean	Dragonera, Balearic Islands	Lab. Experiment	Spain	https://doi.org/10.1016/j.marpolbul.2015.05.024
	Buonomo et al. (2018)	Ocean Warming	High to Very High	High	+0.8 to +3.1	RCP2.6 and 8.5 (mid- and end of century)	Mediterranean Sea		Modeling	Italy + Portugal	https://doi.org/10.1016/j.marenvres.2018.04.013
MEGAFAUNA	Chatzimentor et al. (2021)	Ocean Warming	Undetectable	Medium to high	+3.1	RCP8.5 (end of century)	Mediterranean Sea		Remote Sensing	Greece	https://doi.org/10.1016/j.ecochg.2021.100038
	Albouy et al. (2022)	Ocean Warming	Undetectable to Moderate	Low	+1 to +3.1	RCP2.6 and 8.5 (end of century)	Mediterranean Sea		Modeling	France	https://doi.org/10.1038/s41598-019-57280-3
	Almpanidou et al. (2019)	Ocean Warming	Undetectable to Moderate	Low	+0.8 to +1.6	RCP4.5 (to the end of century)	East Mediterranean		Remote Sensing	Greece	https://doi.org/10.1016/j.jembe.2019.151223
	van Leeuwen et al. (2022)	Ocean Warming	Moderate to High	High	+0.8 to +3.1	RCP4.5 and 8.5 (mid- and end of century)	East Mediterranean	The Rhodes Gyre	Modeling	The Netherlands	https://doi.org/10.3354/meps14016

## Sheet: Coastal ecosystems
Ecosystems	Publications	Main drivers	Risk	Confidence level	ΔSST (°C)	Climate Scenarios /Method for conversion to ΔSST	General study area	Specific Sites	Type of study	Country of the first author	DOI
SANDY BEACHES AND SAND DUNES	Sánchez-Artús et al. (2023)	Storm surges, Sea Level Rise	Undetectable to Moderate	Low	+1.6 to +3.1	RCP 4.5 and RCP 8.5 (2081 to 2100)	North-West Mediterranean	Catalan coast	Modeling	Spain	https://doi.org/10.3389/fmars.2023.1125138
	Sharaane and Udo (2020)	Sea Level Rise	Moderate to High	High	+1 to +3.1	RCP2.6 to 8.5 (end of century)	South-East Mediterranean	The entire Egyptian coast	Remote Sensing	Egypt	https://doi.org/10.1016/j.apor.2019.101972
	Antonioli et al. (2020)	Sea Level Rise	High	Low	+3.1	RCP8.5 (end of century)	West Mediterranean	Fertilia, Valledoria, Tronto, Sangro, Marina di Campo	Remote Sensing	Italy	https://doi.org/10.3390/w12082173
	Enríquez et al. (2017)	Sea Level Rise	High	High	+1.6 to +3.1	RCP4.5 and 8.5 (end of century)		Balearic Islands	Modeling	Spain	https://doi.org/10.5194/nhess-17-1075-2017
	Rizzi et al. (2017)	Storm surges, Sea Level Rise	High	High	+1	RCP2.6 (end of century)	North-East Mediterranean	Near Venice	Modeling	Italy	https://doi.org/10.1007/s11852-017-0517-5
	Rizzo et al. (2022)	Sea Level Rise	High	High	+0.8 to +3.1	RCP2.6 and 8.5 (mid- and end of century)	East Mediterranean	Island of Gozo	Remote Sending	Italy	https://doi.org/10.3390/w14030416
	Sanuy et al. (2018)	Sea Level Rise	High	High	+3.1	RCP8.5 (end of century)	North-East and North-West Mediterranean	Tordera Delta (Spain) + Lido degli Estensi–Spina (Italy)	Modeling	Spain	https://doi.org/10.5194/nhess-18-1825-2018
	Thiéblemont et al. (2021)	Sea Level Rise	High	Low	+3.1	RCP8.5 (end of century)	West Mediterranean	Castellón, Spain	Modeling	France	https://doi.org/10.5194/nhess-21-2257-2021
	Varela et al. (2019)	Sea Level Rise	High	High	+2.3 to +3.1	RCP6.0 and 8.5 (end of century)	East Mediterranean	Alagadi, Northern Cyprus	Remote Sensing	UK	https://doi.org/10.1111/gcb.14526
	Monioudi et al. (2017)	Sea Level Rise	High to Very High	Very High	+2 to +5.3	RCP4.5 and 8.5 (end of century)	North-East Mediterranean	Aegean archipelago	Remote Sensing	Greece	https://doi.org/10.5194/nhess-17-449-2017
	Monioudi et al. (2023)	Storm surges, Sea Level Rise	High to Very High		+0.8 to +3.1	RCP4.5 and 8.5 (mid- and end of century)	East Mediterranean	Entire Cypriot coasts	Remote Sensing	Greece	https://doi.org/10.3389/fmars.2023.1188896
	Vandelli et al. (2022)	Sea Level Rise	High to Very High	Medium	+0.8 to +3.1	RCP2.6 and 8.5 (mid- and end of century)	East Mediterranean	Island of Gozo	Remote Sensing	Italy	https://doi.org/10.1080/17445647.2022.2145918
	Anzidei et al. (2021)	Sea Level Rise	Very High	High	+0.8 to +3.1	RCP2.6 and 8.5 (mid- and end of century)	West Mediterranean	The Island of Panarea	Remote Sensing	Italy	https://doi.org/10.3390/rs13061108
	Filippaki et al. (2023)	Sea Level Rise	Very High	High	> +3.1°C	RCP8.5 (2150)	North-East Mediterranean	Messolonghi Area—Western Greece	In Situ, Remote Sensing	Greece	https://doi.org/10.3390/cli11010024
	Prisco et al. (2013)	Air warming, Precipitations	Very High	High	+0.9 to +1	SRES A2 and B2 (mid-century)	East and West Mediterranean	The entire Italian coast	Modeling	Italy	https://doi.org/10.1371/journal.pone.0068850
ROCKY COASTS	Sharaan and Udo (2020)	Sea Level Rise	Undetectable	High	+1 to +3.1	RCP2.6 to 8.5	South-East Mediterranean	The entire Egyptian coast	Remote Sensing	Egypt	https://doi.org/10.1016/j.apor.2019.101972
	Faour et al. (2013)	Sea Level Rise	Undetectable to Moderate	Low	+1.6 to +3.1	RCP4.5 and 8.5 (equivalents) (end of century)	South-East Mediterranean	Syrian coastal area. The Syrian shoreline spread from Long/Lat (35.917, 35.92) North (Turkish border) to the South (35.975, 34.633) (Lebanese border).	Remote Sensing	Lebanon	Journal of Surveying and Mapping Engineering, Vol. 1 Iss. 3, PP. 41-48
	Antonioli et al. (2020)	Sea Level Rise	High	Low	+3.1	RCP8.5 (end of century)	North-East, West and South Mediterranean	Brindisi Kerkennah Mallorca	Remote Sensing	Italy	https://doi.org/10.3390/w12082173
	Bonello et al. (2022)	Sea Level Rise, Ocean Warming	High	High	+1 to +3.1	RCP2.6, 4.5, and 8.5 (end of century)	North-West Mediterranean	Nervi (Ligurian Sea)	Modeling	Italy	https://doi.org/10.4081/jbr.2022.10485
	Lo Presti et al. (2022)	Sea Level Rise	High	Medium	+3.1	RCP8.5 (end of century)	West Mediterranean	North-Eastern Sicily continental margin	Remote Sensing	Italy	https://doi.org/10.1007/s11001-021-09463-9
	Milazzo et al. (2014)	Ocean Acidification	High	High	+2.05 to > +4.5 °C		West Mediterranean	Cala Isola, NW Sicily, Italy	CO2 vents	Italy	https://doi.org/10.1038/srep04189
	Rilov et al. (2021)	Sea Level Rise	High	High	+1.6 to +2.3	Modest IPCC scenarios (end of century)	South-East Mediterranean	The Israeli Mediterranean coast, South-East Levantine	Mesocosm Experiment	Israel	https://doi.org/10.1016/j.scitotenv.2021.148377
	Rizzo et al. (2022)	Sea Level Rise	Moderate to High	High	+0.8 to +3.1	RCP2.6 and 8.5 (mid- and end of century)	East Mediterranean	Marsalforn and Ramla in Gozo island, Malta	Remote Sending	Italy	https://doi.org/10.3390/w14030416
	Freitas et al. (2023a)	Ocean Warming	High to Very High	Low	+0.8 to +3.1	RCP4.5 and 8.5 (mid- and end of century)	Mediterranean Sea		Modeling	Portugal	https://doi.org/10.1016/j.marenvres.2023.105945
COASTAL WETLANDS	Ramírez et al. (2018)	Precipitations	Moderate	High	+1.6 to +3.1°C	RCP4.5 and 8.5 (end of century)	Atlantic	Tinto and Odiel marshes, the Doñana wetland complex and Bay of Cadiz	Modeling	Spain	https://doi.org/10.1371/journal.pone.0192702
	Antonioli et al. (2020)	Sea Level Rise	High	Low	+3.1	RCP8.5 (end of century)	West and East Mediterranean	Orosei Larnaka	Remote Sensing	Italy	https://doi.org/10.3390/w12082173
	Micòl Mastrocicco et al. (2019)	Seawater Intrusion , Sea Level Rise	High	Medium	+0.8 to +1	RCP4.5 and 8.5 (mid- century)	West Mediterranean	The Variconi Coastal Wetland (Italy)	In Situ, Modeling	Italy	https://doi.org/10.3390/w11071502
	Lefebvre et al. (2019)	Precipitations	High	High	+0.8 to 3.1	RCP8.5 (mid-and end of century)	Mediterranean Sea		Modeling	France	https://doi.org/10.1016/j.scitotenv.2019.07.263
	Rizzi et al. (2017)	Storm Surges, Sea Level Rise	High	High	+1	45 cm sea level rise ~ RCP2.6 (end of century)	North-East Mediterranean	Near Venice	Modeling	Italy	https://doi.org/10.1007/s11852-017-0517-5
	Estrela-Segrelles et al. (2021)	Sea Level Rise	High to Very High	High	+1 to 3.1	RCP 8.5 (mid- and end of century)	West Mediterranean	Júcar River Basin District	Modeling	Spain	https://doi.org/10.1016/j.scitotenv.2021.148032
	Rizzi et al. (2016)	Sea Level Rise	Very High	High	+2.35	SRES A1B (end of century)	South-West Mediterranean	Gulf of Gabes, Tunisia	Modeling	Italy	https://doi.org/10.1007/s11625-015-0344-2
LAGOONS AND DELTAS	Simantiris and Avlonitis (2023)	Ocean Warming	Undetectable	Low	+0.6	CMIP scenario	North-East Mediterranean	Antinioti lagoon in Corfu island	Modeling	Greece	https://doi.org/10.1016/j.ecss.2023.108231
	Range et al. (2014)	Ocean Acidification	Moderate	low	> +4.5		North-East Mediterranean	Station of Chioggia, in the lagoon of Venice	Lab. Experiment, Mesocosm Experiment	Portugal	https://doi.org/10.1007/s10113-013-0478-7
	Sánchez-Arcilla et al. (2008)	Sea Level Rise	Moderate	Medium	+3.1	Assuming the wost scenario RCP8.5 (end of century)	North-West Mediterranean	Ebro delta coast	Modeling	Spain	https://doi.org/10.2112/07A-0005.1
	Sharaan and Udo (2020)	Sea Level Rise	Moderate to High	High	+1 to +3.1	RCP2.6, and 8.5 (end of century)	South-East Mediterranean	The entire Egyptian Coast	Remote Sensing	Egypt	https://doi.org/10.1016/j.apor.2019.101972
	Abd-Elhamid et al. (2023)	Sea Level Rise	High	Low	+1	Assuming the wost scenario RCP8.5 (mid- century)	South-East Mediterranean	Nile Delta	Remote Sensing	Egypt	https://doi.org/10.3390/rs15071737
	Antonioli et al. (2020)	Sea Level Rise	High	Low	+3.1	RCP8.5 (end of century)	West and East Mediterranean	Bastia, Lesina, Granelli, Stagnone e Saline di Marsala	Remote Sensing	Italy	https://doi.org/10.3390/w12082173
	La Jeunesse et al. (2016)	Precipitations , Terrestrial Runoff	High	High	+2.35	SRES A1B (end of century)	North-West Mediterranean	Thau lagoon, South of France	Modeling	France	https://doi.org/10.1016/j.ocecoaman.2015.05.014
	UNEP/MAP-RAC/SPA (2009)	Sea Level Rise	High	High	+2.35	SRES A1B (end of century)	South Mediterranean		Review	Algeria, Egypt, Lebanon, Tunisia, Morrocco, Syria	https://www.rac-spa.org/sites/default/files/doc_climate_change/ccc_med_arab.pdf
	Soulié et al. (2023)	Marine Heat Waves	High to Very High	High	+5		North-West Mediterranean	Thau lagoon	Mesocosm Experiment	France	https://doi.org/10.1038/s41598-023-35311-4
	Lionello et al. (2021)	Sea Level Rise	Very High	Very high	+1 to +3.1	RCP2.6, and 8.5 (end of century)	North-East Mediterranean	Venice Lagoon	Modeling	Italy	https://doi.org/10.5194/nhess-21-2633-2021
	Lloret et al. (2008)	Nutrients Enrichment	Very High	High	+3.1	Assuming the wost scenario RCP8.5 (end of century)	South-West Mediterranean	Mar Menor coastal lagoon, Spain	In Situ, Modeling	Spain	https://doi.org/10.1016/j.ecss.2008.01.003
	Filippaki et al. (2023)	Sea Level Rise	Very High	High	> +3.1	RCP8.5 (2150)	North-East Mediterranean	Messolonghi Area—Western Greece	In Situ, Remote Sensing	Greece	https://doi.org/10.3390/cli11010024
	Shaltout et al. (2015)	Sea Level Rise	Very High	Very high	+1 to +3.1	RCP2.6, 4.5, 6.0 and 8.5 (end of century)	South-East Mediterranean	Southern Levantine sub-basin and along the Egyptian coast	Remote Sensing	Egypt	https://doi.org/10.1016/j.oceano.2015.06.004
SALT MARSHES	Antonioli et al. (2020)	Sea Level Rise	High	Low	+3.1	RCP8.5 (end of century)	West Mediterranean	Ibiza	Remote Sensing	Italy	https://doi.org/10.3390/w12082173
	Scardino et al. (2022)	Sea Level Rise	High	Moderate	+0.8 to >+3.1	RCP2.6 and 8.5 (to 2150)	East Mediterranean	The Gulf of Manfredonia, Tavoliere delle Puglie	Remote Sensing	Italy	https://doi.org/10.3390/rs14194936
	Borges et al. (2021)	Invasive Species	High to Very High	Moderate	+1.6 to 3.1	RCP4.5 and 8.5 (end of century)	Mediterranean Sea		Modeling	Portugal	https://doi.org/10.3389/fmars.2021.696333
	Anzidei et al. (2021)	Sea Level Rise	Very High	High	+0.8 to +3.1	RCP2.6 to 8.5 (mid- and end of century)	East Mediterranean	Sicily–Calabria region	Remote Sensing	Italy	https://doi.org/10.3390/rs13061108
	Strain et al. (2017)	Air Warming, Precipitations	Very High	High	+2	SRES A2 scenario like experiment conditions	North-East Mediterranean	Sacca II Lagoon in the Bellocchio Nature Reserve	Mesocosm Experiment	Italy + Australia	https://doi.org/10.1111/1365-2745.12799
COASTAL AQUIFERS	El Asri et al. (2022)	Precipitations	Moderate	Medium	+0.8 to +3.1°C	RCP 4.5 and 8.5 (mid- and end of century)	West Mediterranean	Ghis-Nekkor plain, north of Morocco	Modeling	Morocco	https://doi.org/10.1007/978-3-030-78566-6_1
	Pisinaras et al. (2021)	Sea Level Rise, Precipitations, Seawater Intrusion	Moderate to High	Medium to High	+1 to +3.1	RCP8.5 (mid- and end of century)	North-East Mediterranean	Pinios River Deltaic Plain	Modeling	Greece	https://doi.org/10.3390/w13010108
	Al-Najjar et al. (2022)	Precipitations, Sea Level Rise	High	High	+0.8 to +1	RCP2.6, 4.5, and 8.5 (mid- century)	South-East Mediterranean	Gaza Strip	Modeling	Turkey	https://doi.org/10.2166/wcc.2022.339
	Lyra and Loukas (2023)	Seawater Intrusion	High	Low	+0.8 to +3.1	RCP4.5 and 8.5 (mid- and end of century)	East Mediterranean	Almyros basin, in central Greece	Modeling	Greece	https://doi.org/10.3390/ECWS-7-14180
	Schorpp et al. (2023)	Seawater Intrusion, Sea Level Rise	High	Low to moderate	+3.1	RCP8.5 (2080)	North-West Mediterranean	Roussillon, southern France	Modeling	Switzerland	https://doi.org/10.1007/s12665-023-10877-4
	Sefelnasr and Sherif (2014)	Sea Level Rise	High	High	+3.1	0.58 to 1 m sea level rise, equivalent to the worst scenario RCP8.5 (end of century)	South-East Mediterranean	Nile Delta Aquifer	Modeling	Egypt	https://doi.org/10.1111/gwat.12058
	Stigter et al. (2014)	Air Warming, Precipitations	High	High	+0.9 to 2.35	SRES A1B (mid- and end of century)	West Mediterranean	La Plana de La Galera, Ebre Delta	Modeling	Portugal	https://doi.org/10.1007/s10113-012-0377-3
	Carneiro et al. (2010)	Sea Level Rise	High to Very High	High	+1.6 to +3.1	SRES B1, A1B and A1FI (end of century)	South-West Mediterranean	The plain of Saïdia, northeast Morocco	Modeling	Portugal	https://doi.org/10.1007/s12665-009-0339-3
	Romanazzi et al. (2015)	Sea Level Rise, Seawater Intrusion	Very High	High	+2.35	SRES A1B (end of century)	East Mediterranean	karstic Apulian aquifer	Modeling	Italy	https://doi.org/10.1007/s12665-015-4423-6
